# Supplementary material for: Interpretable artificial intelligence framework for COVID-19 screening on chest X-rays
Source: PubMed Central journal article supplement — Exp Ther Med. 2020 May 27;20(2):727–35. doi: 10.3892/etm.2020.8797 (PMC7388253; doi:10.3892/etm.2020.8797), 2020-05-27
Supplement: Supplementary_Data.pdf [file Supplementary_Data.pdf]

Figure S1. Binary classification - Testing set confusion matrices for all 5 folds.

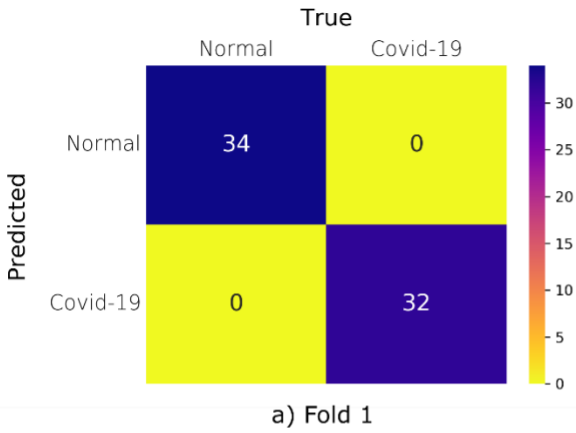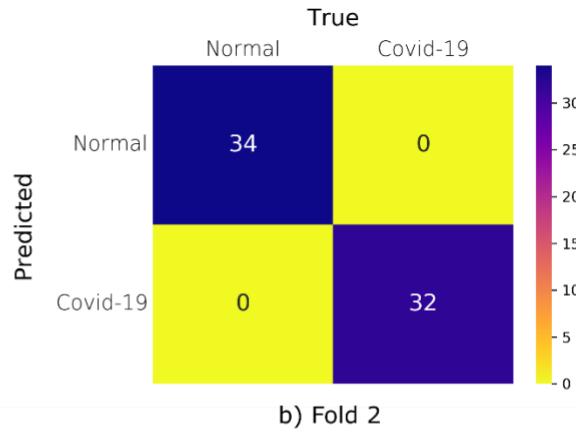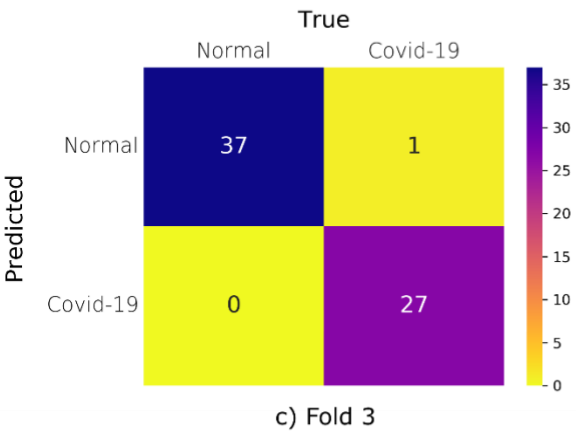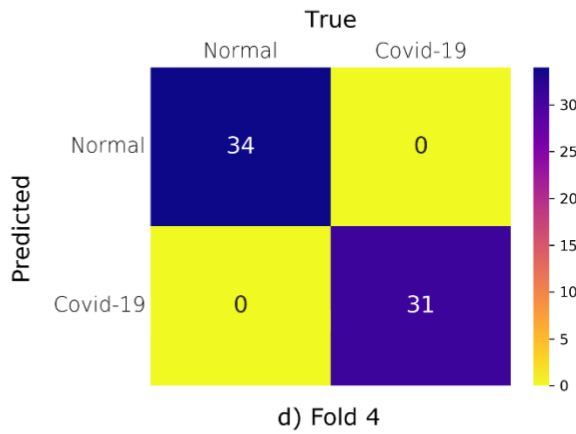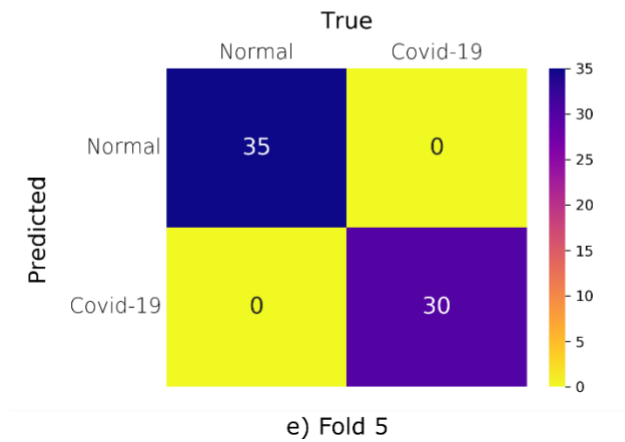

Figure S2. Ternary classification - Testing set confusion matrices for all 5 folds.

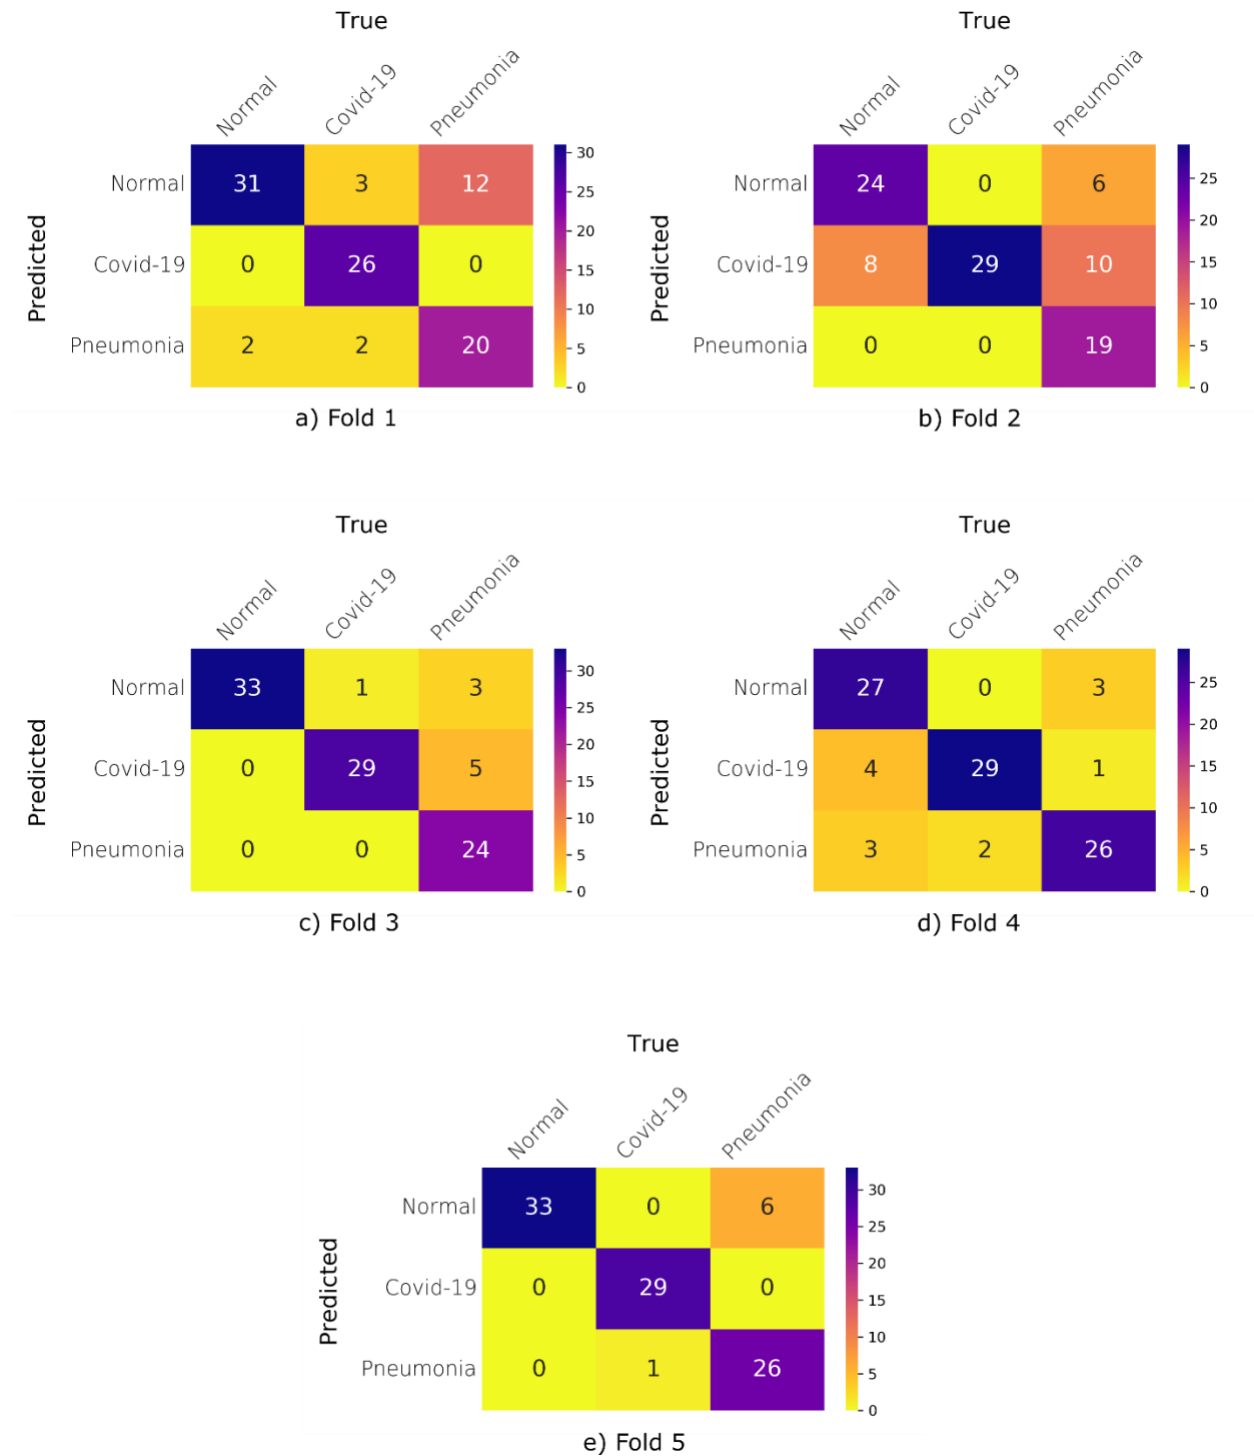

Figure S3. Quaternary classification - Testing set confusion matrices for all 5 folds.

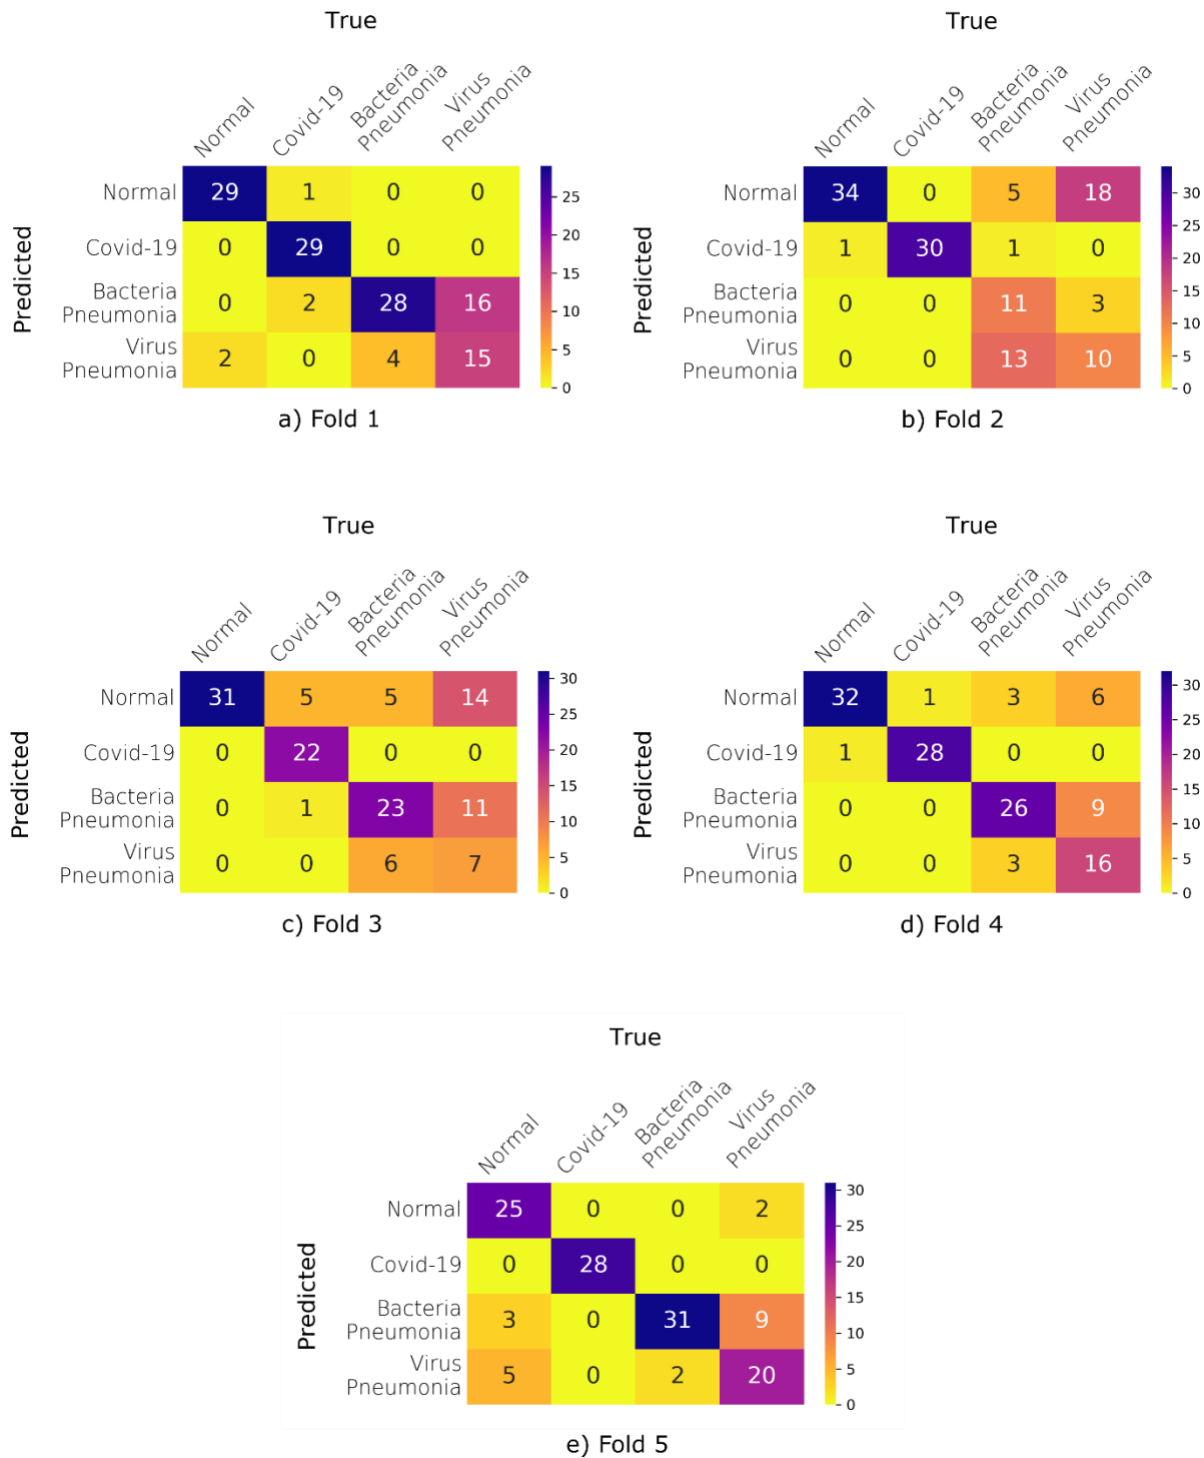

Table SI. Ternary classification - Normal class performance on the testing sets across all folds.

|     | Mean | Median | STD  | Min  | Max    |
|-----|------|--------|------|------|--------|
| SPC | 0.89 | 0.91   | 0.08 | 0.76 | 0.9581 |
| SEN | 0.90 | 0.94   | 0.12 | 0.75 | 1      |
| PRE | 0.82 | 0.85   | 0.09 | 0.67 | 0.9    |
| ACC | 0.89 | 0.89   | 0.06 | 0.98 | 0.96   |

Table SII. Ternary classification - COVID-19 class performance on the testing sets across all folds.

|     | Mean | Median | STD  | Min  | Max  |
|-----|------|--------|------|------|------|
| SPC | 0.92 | 0.92   | 0.11 | 0.73 | 1    |
| SEN | 0.94 | 0.97   | 0.06 | 0.84 | 1    |
| PRE | 0.86 | 0.85   | 0.16 | 0.62 | 1    |
| ACC | 0.92 | 0.94   | 0.07 | 0.81 | 0.99 |

Table SIII. Ternary classification - Pneumonia class performance on the testing sets across all folds.

|     | Mean | Median | STD  | Min  | Max  |
|-----|------|--------|------|------|------|
| SPC | 0.97 | 0.98   | 0.04 | 0.92 | 1    |
| SEN | 0.72 | 0.75   | 0.13 | 0.54 | 0.87 |
| PRE | 0.93 | 0.96   | 0.08 | 0.83 | 1    |
| ACC | 0.88 | 0.91   | 0.05 | 0.83 | 0.93 |

Table SIV. Quaternary classification - Normal class performance on the testing sets across all folds.

|     | Mean | Median | STD  | Min  | Max  |
|-----|------|--------|------|------|------|
| SPC | 0.87 | 0.89   | 0.12 | 0.74 | 0.99 |
| SEN | 0.93 | 0.97   | 0.10 | 0.76 | 1    |
| PRE | 0.76 | 0.76   | 0.18 | 0.56 | 0.97 |
| ACC | 0.89 | 0.91   | 0.07 | 0.81 | 0.98 |

Table SV. Quaternary classification - COVID-19 class performance on the testing sets across all folds.

|     | Mean | Median | STD  | Min  | Max |
|-----|------|--------|------|------|-----|
| SPC | 0.99 | 1      | 0.01 | 0.98 | 1   |
| SEN | 0.93 | 0.97   | 0.09 | 0.79 | 1   |
| PRE | 0.98 | 1      | 0.03 | 0.94 | 1   |
| ACC | 0.98 | 0.98   | 0.02 | 0.95 | 1   |



Table SVI. Quaternary classification - Bacteria Pneumonia class performance on the testing sets across all folds.

|     | Mean | Median | STD  | Min  | Max  |
|-----|------|--------|------|------|------|
| SPC | 0.88 | 0.87   | 0.06 | 0.81 | 0.97 |
| SEN | 0.73 | 0.81   | 0.23 | 0.37 | 0.94 |
| PRE | 0.70 | 0.72   | 0.07 | 0.61 | 0.79 |
| ACC | 0.85 | 0.83   | 0.03 | 0.82 | 0.89 |

Table SVII. Quaternary classification - Virus Pneumonia class performance on the testing sets across all folds.

|     | Mean | Median | STD  | Min  | Max  |
|-----|------|--------|------|------|------|
| SPC | 0.93 | 0.94   | 0.04 | 0.86 | 0.97 |
| SEN | 0.44 | 0.48   | 0.17 | 0.22 | 0.65 |
| PRE | 0.65 | 0.71   | 0.16 | 0.43 | 0.84 |
| ACC | 0.80 | 0.83   | 0.06 | 0.73 | 0.86 |
